# Supplementary material
Source: PubMed Central journal article supplement (PMC3411992)
Supplement: 1202907109_pnas.201202907SI.pdf [file 1202907109_pnas.201202907SI.pdf]

# Supporting Information

## Salazar and Marquis 10.1073/pnas.1202907109

### SI Methods

**Site Descriptions.** Sites for the present study were selected based on two main criteria: (i) similar biotic and abiotic factors; and (ii) the presence of both focal *Piper* species.

**Mexico, Veracruz, Los Tuxtlas.** Los Tuxtlas is a tropical rainforest in the southeastern part of Veracruz, Mexico. This site is considered to be the “northern limit” of the lowland tropical rainforest ecosystem of the Neotropics (1, 2). We carried out the present study within the Los Tuxtlas Biological Research Station (Universidad Nacional Autónoma de México; 95°W; 18°N) and the surrounding area. The reserve has 650 ha of forest with an average temperature of 26 °C, ranging from 20° to 28 °C, and a mean annual rainfall of 4,500 mm (1). All sampling at this site was performed between 100 and 600 m above sea level (Fig. S5).

**Costa Rica, Heredia, La Tirimbina.** La Tirimbina Biological Reserve is located in the Atlantic lowlands of Heredia, Costa Rica (3). The reserve includes 350 ha of lowland tropical rainforest but forms part of a network of private and national reserves that include the La Selva Biological Station (Organization of Tropical Studies) and Braulio Carrillo National Park. The reserve has a mean annual temperature of 25.3 °C (ranging from 20.2 °C to 30.0 °C) and 3,800 mm of annual precipitation (10°82'N; 84°87'W). All sampling at this site was performed between 150 and 300 m above sea level (Fig. S5).

**Ecuador, Napo, Jatun Sacha.** Jatun Sacha Biological Station and Reserve are located in eastern Ecuador where the upper Amazon Basin meets the base of the eastern Andes. The reserve includes 1,700 ha of tropical lowland rainforest (00°59'S; 77°36'W) with a mean annual temperature of 25.0 °C and 3,700 mm of annual precipitation. All sampling at this site was performed between 400 and 500 m above sea level (4) (Fig. S5).

**Yanamono, Loreto, Peru.** The Yanamono region is located 80 km northeast of Iquitos. It includes a 200 ha island in the Amazon River and riverside reserve of more than 1,600 ha of lowland tropical rainforest that is owned by the local community (03°25'S; 72°45'W). It has an annual precipitation of 3,600 mm and a mean temperature of 26 °C, ranging from 20.8 °C to 31.7 °C (5). All sampling at this site was performed between 100 and 150 m above sea level (Fig. S5).

**Chalalan, Madidi, La Paz, Bolivia.** The Chalalan Natural Reserve is located within the Madidi National Park, in the department of La Paz, Bolivia (14°25'S; 67°55'W). The park includes 12,700 km<sup>2</sup> of

tropical lowland rainforest with a mean annual temperature of 26.0 °C (ranging between 18 °C to 32 °C) and 3,200 mm of annual precipitation (6, 7). All sampling at this site was performed between 400 and 500 m above sea level (Fig. S5).

**Plant Host Species Details.** *Piper aduncum* L. (*Piper aduncum* L. (Species Plantarum. Editio sexta 1: 29. 1753.) is one of the most widely known species of *Piper* in the Neotropics. It is a very common pioneer and secondary forest small tree species that can grow up to 12 m in height. It is commonly found in medium to full sunlight, forest edges, clearings, river shores, and urban and agricultural settings (8). It has been extensively studied for its complex secondary chemistry (9–11). However, more recently, this species has gained more attention because of its invasive status in the Pacific islands of Southeast Asia (8, 12). In its native range, the species is more common at low elevations (0–1,000 m above sea level) and normally grows in multi-*Piper* species patches. Leaves are relatively tough and coarse, covered by small stiff trichomes.

*Piper aequale* Vahl. (*Piper aequale* Vahl. (Eclogae Americanae 1: 4, t. 3. 1797.) is a relatively unknown, exclusively Neotropical species. This small shrub is a “primary forest” species that can grow up to 3 m in height. It is commonly found in the forest understory under closed canopy (13). Like *P. aduncum*, this species has been studied for its secondary chemistry, although not in much detail (10, 14). In its range, the species is found mainly at low elevations (0–1,300 m above sea level) and normally grows in small multi-*Piper* species patches. Leaves are relatively soft, smooth, and glabrous.

**Herbivore Diet Breadth Assessment.** After the identification of the caterpillars, databases were used to compile a list of plants that have been reported as hosts for the each particular caterpillar. In a very few cases where (i) caterpillars of a particular species were not abundant enough to complete feeding trials in the field and (ii) the particular species was not found in any of the databases or bibliographical sources consulted, we extrapolated their diet breadth from the predominant diet breadth of close relatives (species from the same genus present at the same locality).

Refer to refs. 4 and 15–26 for the sources used to confirm and assess herbivore diet breadth.

1. Estrada A, Rivera A, Coates-Estrada R (2002) Predation of artificial nests in a fragmented landscape in the tropical region of Los Tuxtlas, Mexico. *Biol Conserv* 106:199–209.
2. Martinez-Garza C, Gonzalez-Montagut R (2002) Seed rain of fleshy-fruited species in tropical pastures in Los Tuxtlas, Mexico. *J Trop Ecol* 18:457–462.
3. Dyer LA, Letourneau DK, Chavarria GV, Amoretti DS (2010) Herbivores on a dominant understory shrub increase local plant diversity in rain forest communities. *Ecology* 91:3707–3718.
4. Murray D,L. (1996) A survey of the butterfly fauna of Jatun Sacha, Ecuador (Lepidoptera: Hesperioidea and Papilionoidea). *J Res Lepid* 35:42–60.
5. Gentry A,H (1988) Changes in Plant Community Diversity and Floristic Composition on Environmental and Geographical Gradients. *Ann Mo Bot Gard* 75:1–34.
6. Macia MJ (2008) Woody plants diversity, floristic composition and land use history in the Amazonian rain forests of Madidi National Park, Bolivia. *Biodivers Conserv* 17:2671–2690.
7. Fuentes A (2005) Una introducción a la vegetación de la región de Madidi. *Ecología en Bolivia* 40:1–31.
8. Leps J, et al. (2002) Successful invasion of the neotropical species *piper aduncum* in rain forests in Papua New Guinea. *Appl Veg Sci* 5:255–262.
9. Maia JGS, et al. (1998) Constituents of the essential oil of *Piper aduncum* L. growing wild in the Amazon region. *Flavour Fragrance J* 13:269–272.
10. Maxwell A, Dabideen D, Reynolds WF, McLean S (1999) Neolignans from *Piper aequale*. *Phytochemistry* 50:499–504.
11. Misni N, Othman H, Sulaiman S (2011) The effect of *Piper aduncum* Linn. (Family: Piperaceae) essential oil as aerosol spray against *Aedes aegypti* (L.) and *Aedes albopictus* Skuse. *Trop Biomed* 28:249–258.
12. Novotný V, et al. (2003) Colonising aliens: Caterpillars (Lepidoptera) feeding on *Piper aduncum* and *P. umbellatum* in rainforests of Papua New Guinea. *Ecol Entomol* 28:704–716.
13. Sanchez-Coronado ME, Rincon E, Vazquez-Yanes C (1990) Growth responses of three contrasting *Piper* species growing under different light conditions. *Can J Bot* 68:1182–1186.
14. Tinoco-Ojanguen C, Percy RW (1993) Stomatal dynamics and its importance to carbon gain in two rainforest *Piper* species - II. Stomatal versus biochemical limitations during photosynthetic induction. *Oecologia* 94:395–402.
15. Janzen DH, Hallwachs W (2009) *Dynamic Database for an Inventory of the Macro-caterpillar Fauna, and Its Food Plants and Parasitoids, of Area de Conservacion Guanacaste (ACG), Northwestern Costa Rica*. <http://janzen.sas.upenn.edu>. Accessed 2009–2010.
16. Dyer L, Gentry GL (2002) *Caterpillars and Parasitoids of a Tropical Lowland Wet Forest*. <http://www.caterpillars.org>. Accessed 2009–2010.
17. Dyer L, et al. (2009) *Caterpillars and Parasitoids of the Eastern Andes in Ecuador*. <http://www.caterpillars.org>. Accessed 2009–2010.
18. InBio (2009) *Sistema Costarricense de Información sobre Biodiversidad; Costa Rican System of Biodiversity Data* (Spanish). [www.crbio.cr](http://www.crbio.cr). Accessed 2009–2010.







**Table S1. Results for the ANOVAs test for the effect of latitudinal site and population on herbivore density, species richness, and plant damage**

| Species           | Response variables                    | Sig. | Source           | df | F      | P       |
|-------------------|---------------------------------------|------|------------------|----|--------|---------|
| <i>P. aduncum</i> | Total herbivore species richness      | *    | Latitudinal site | 4  | 12.81  | <0.0001 |
|                   |                                       | ~    | Population       | 7  | 0.37   | 0.9079  |
| <i>P. aequale</i> |                                       | *    | Latitudinal site | 4  | 8.35   | 0.0001  |
|                   |                                       | *    | Population       | 7  | 4.45   | 0.002   |
| <i>P. aduncum</i> | Specialist herbivore species richness | ~    | Latitudinal site | 4  | 1.25   | 0.3118  |
|                   |                                       | ~    | Population       | 7  | 2.00   | 0.0909  |
| <i>P. aequale</i> |                                       | ~    | Latitudinal site | 4  | 1.48   | 0.2334  |
|                   |                                       | ~    | Population       | 7  | 1.07   | 0.4045  |
| <i>P. aduncum</i> | Genus herbivore species richness      | *    | Latitudinal site | 4  | 5.35   | 0.0025  |
|                   |                                       | ~    | Population       | 7  | 0.50   | 0.8257  |
| <i>P. aequale</i> |                                       | ~    | Latitudinal site | 4  | 2.29   | 0.0840  |
|                   |                                       | ~    | Population       | 7  | 2.24   | 0.0604  |
| <i>P. aduncum</i> | Generalist herbivore species richness | *    | Latitudinal site | 4  | 6.40   | 0.0009  |
|                   |                                       | ~    | Population       | 7  | 0.21   | 0.9783  |
| <i>P. aequale</i> |                                       | *    | Latitudinal site | 4  | 4.64   | 0.0053  |
|                   |                                       | ~    | Population       | 7  | 1.92   | 0.1026  |
| <i>P. aduncum</i> | Total herbivore density               | *    | Latitudinal site | 4  | 4.76   | 0.0046  |
|                   |                                       | ~    | Population       | 7  | 0.4146 | 0.8850  |
| <i>P. aequale</i> |                                       | *    | Latitudinal site | 4  | 9.17   | <0.0001 |
|                   |                                       | *    | Population       | 7  | 2.77   | 0.0252  |
| <i>P. aduncum</i> | Specialist herbivore density          | ~    | Latitudinal site | 4  | 1.22   | 0.3240  |
|                   |                                       | ~    | Population       | 7  | 1.40   | 0.2441  |
| <i>P. aequale</i> |                                       | ~    | Latitudinal site | 4  | 1.13   | 0.3584  |
|                   |                                       | ~    | Population       | 7  | 0.98   | 0.4605  |
| <i>P. aduncum</i> | Genus herbivore density               | *    | Latitudinal site | 4  | 5.10   | 0.0032  |
|                   |                                       | ~    | Population       | 7  | 0.24   | 0.9691  |
| <i>P. aequale</i> |                                       | *    | Latitudinal site | 4  | 4.16   | 0.009   |
|                   |                                       | ~    | Population       | 7  | 1.86   | 0.1137  |
| <i>P. aduncum</i> | Generalist herbivore density          | *    | Latitudinal site | 4  | 9.33   | <0.0001 |
|                   |                                       | ~    | Population       | 7  | 0.26   | 0.9635  |
| <i>P. aequale</i> |                                       | *    | Latitudinal site | 4  | 5.31   | 0.0026  |
|                   |                                       | ~    | Population       | 7  | 1.81   | 0.1229  |
| <i>P. aduncum</i> | Herbivory percentage                  | ~    | Latitudinal site | 4  | 0.33   | 0.8553  |
| <i>P. aequale</i> |                                       | ~    | Latitudinal site | 4  | 1.48   | 0.2335  |

All values were normalized by total leaf area. Variables with asterisks indicate a significant difference (Sig.) among sites or populations. ~, no significant difference.

**Table S2. Regression through the origin of percentage of herbivory with total herbivore abundance and herbivore species richness for *P. aduncum* and *P. aequale***

| Latitudinal site                                                  | $R^2$ * | Adjusted $R^2$ | SE <sup>†</sup> | df | F       | P      |
|-------------------------------------------------------------------|---------|----------------|-----------------|----|---------|--------|
| <i>P. aduncum</i> (% of herbivory vs. total herbivore abundance)  |         |                |                 |    |         |        |
| Mexico                                                            | 0.902   | 0.888          | 4.93499         | 8  | 64.379  | 0.0001 |
| Costa Rica                                                        | 0.884   | 0.868          | 5.99812         | 8  | 53.454  | 0.0001 |
| Ecuador                                                           | 0.918   | 0.906          | 4.38692         | 8  | 78.48   | 0.0001 |
| Peru                                                              | 0.932   | 0.922          | 4.48672         | 8  | 95.704  | 0.0001 |
| Bolivia                                                           | 0.936   | 0.927          | 3.83755         | 8  | 102.142 | 0.0001 |
| <i>P. aequale</i> (% of herbivory vs. total herbivore abundance)  |         |                |                 |    |         |        |
| Mexico                                                            | 0.837   | 0.813          | 4.766           | 8  | 35.822  | 0.001  |
| Costa Rica                                                        | 0.981   | 0.978          | 1.57183         | 8  | 361.5   | 0.0001 |
| Ecuador                                                           | 0.927   | 0.916          | 3.20069         | 8  | 88.436  | 0.0001 |
| Peru                                                              | 0.774   | 0.742          | 6.90461         | 8  | 24.001  | 0.002  |
| Bolivia                                                           | 0.808   | 0.78           | 5.81336         | 8  | 29.383  | 0.001  |
| <i>P. aduncum</i> (% of herbivory vs. herbivore species richness) |         |                |                 |    |         |        |
| Mexico                                                            | 0.94    | 0.932          | 3.84506         | 8  | 110.581 | 0.0001 |
| Costa Rica                                                        | 0.934   | 0.924          | 4.53973         | 8  | 98.536  | 0.0001 |
| Ecuador                                                           | 0.928   | 0.917          | 4.12246         | 8  | 89.799  | 0.0001 |
| Peru                                                              | 0.895   | 0.88           | 5.56708         | 8  | 59.71   | 0.0001 |
| Bolivia                                                           | 0.813   | 0.786          | 6.55284         | 8  | 30.432  | 0.001  |
| <i>P. aequale</i> (% of herbivory vs. herbivore species richness) |         |                |                 |    |         |        |
| Mexico                                                            | 0.913   | 0.901          | 3.4678          | 8  | 73.884  | 0.0001 |
| Costa Rica                                                        | 0.911   | 0.898          | 3.40091         | 8  | 71.715  | 0.0001 |
| Ecuador                                                           | 0.887   | 0.87           | 3.97923         | 8  | 54.745  | 0.0001 |
| Peru                                                              | 0.668   | 0.621          | 8.37194         | 8  | 14.086  | 0.007  |
| Bolivia                                                           | 0.833   | 0.809          | 5.41765         | 8  | 34.892  | 0.001  |

Herbivore abundance is measured as the number of lepidopteran larvae present per 100 m<sup>2</sup> of leaf area. Species richness is calculated as the number of species of lepidopteran larvae present per 100 m<sup>2</sup> of leaf area.

\*For regression through the origin (no-intercept model),  $R^2$  measures the proportion of the variability in the dependent variable about the origin explained by regression. Importantly, this cannot be compared with  $R^2$  for models that include an intercept.

<sup>†</sup>Of the estimate.

**Table S3. Number of species and individuals of lepidopteran larvae by family collected at the five latitudinal sites**

| <i>P. aduncum</i>                                 |                   |                       | <i>P. aequale</i> |                   |                       |
|---------------------------------------------------|-------------------|-----------------------|-------------------|-------------------|-----------------------|
| Family                                            | Number of Species | Number of individuals | Family            | Number of Species | Number of individuals |
| Mexico, Veracruz, Los Tuxtlas Biological Station  |                   |                       |                   |                   |                       |
| Geometridae                                       | 1                 | 17                    | Limacodidae       | 1                 | 9                     |
| Hesperiidae                                       | 2                 | 15                    | Geometridae       | 1                 | 9                     |
| Limacodidae                                       | 1                 | 3                     | Hesperiidae       | 2                 | 12                    |
| Noctuidae                                         | 1                 | 5                     |                   |                   |                       |
| Nymphalidae                                       | 1                 | 8                     |                   |                   |                       |
| Costa Rica, Heredia, Tirimbina Biological Station |                   |                       |                   |                   |                       |
| Arctiidae                                         | 1                 | 1                     | Megalopygidae     | 1                 | 2                     |
| Bombycidae                                        | 1                 | 7                     | Tortricidae       | 1                 | 3                     |
| Crambidae                                         | 3                 | 10                    | Limacodidae       | 2                 | 8                     |
| Geometridae                                       | 3                 | 9                     | Geometridae       | 3                 | 12                    |
| Hesperiidae                                       | 5                 | 45                    | Hesperiidae       | 3                 | 14                    |
| Lasiocampidae                                     | 2                 | 2                     |                   |                   |                       |
| Limacodidae                                       | 3                 | 6                     |                   |                   |                       |
| Noctuidae                                         | 5                 | 49                    |                   |                   |                       |
| Nymphalidae                                       | 2                 | 33                    |                   |                   |                       |
| Papilionidae                                      | 1                 | 14                    |                   |                   |                       |
| Sphingidae                                        | 1                 | 3                     |                   |                   |                       |
| Tortricidae                                       | 3                 | 5                     |                   |                   |                       |
| Ecuador, Napo, Jatun Sacha Biological Station     |                   |                       |                   |                   |                       |
| Arctiidae                                         | 2                 | 3                     | Geometridae       | 2                 | 18                    |
| Bombycidae                                        | 2                 | 2                     | Hesperiidae       | 3                 | 27                    |
| Crambidae                                         | 2                 | 3                     | Limacodidae       | 3                 | 12                    |
| Geometridae                                       | 4                 | 9                     | Tortricidae       | 1                 | 3                     |
| Hesperiidae                                       | 5                 | 20                    | Saturniidae       | 1                 | 1                     |
| Lasiocampidae                                     | 2                 | 4                     | Bombycidae        | 1                 | 2                     |
| Limacodidae                                       | 3                 | 3                     | Pyralidae         | 2                 | 2                     |
| Noctuidae                                         | 5                 | 21                    |                   |                   |                       |
| Nymphalidae                                       | 3                 | 29                    |                   |                   |                       |
| Papilionidae                                      | 1                 | 9                     |                   |                   |                       |
| Sphingidae                                        | 1                 | 3                     |                   |                   |                       |
| Tortricidae                                       | 3                 | 3                     |                   |                   |                       |
| Pyralidae                                         | 3                 | 5                     |                   |                   |                       |
| Peru, Iquitos, Yanamono Island                    |                   |                       |                   |                   |                       |
| Arctiidae                                         | 2                 | 2                     | Limacodidae       | 1                 | 2                     |
| Bombycidae                                        | 1                 | 2                     | Geometridae       | 2                 | 7                     |
| Geometridae                                       | 2                 | 12                    | Saturniidae       | 1                 | 1                     |
| Hesperiidae                                       | 2                 | 28                    | Pyralidae         | 1                 | 1                     |
| Limacodidae                                       | 1                 | 2                     | Hesperiidae       | 2                 | 8                     |
| Noctuidae                                         | 2                 | 10                    |                   |                   |                       |
| Riodinidae                                        | 2                 | 3                     |                   |                   |                       |
| Nymphalidae                                       | 2                 | 6                     |                   |                   |                       |
| Papilionidae                                      | 1                 | 18                    |                   |                   |                       |
| Tortricidae                                       | 3                 | 3                     |                   |                   |                       |
| Bolivia, La Paz, Chalalan Ecological Reserve      |                   |                       |                   |                   |                       |
| Geometridae                                       | 1                 | 18                    | Limacodidae       | 1                 | 3                     |
| Hesperiidae                                       | 1                 | 8                     | Geometridae       | 1                 | 5                     |
| Crambidae                                         | 1                 | 2                     | Hesperiidae       | 1                 | 8                     |
| Noctuidae                                         | 1                 | 5                     |                   |                   |                       |
| Riodinidae                                        | 1                 | 2                     |                   |                   |                       |
| Papilionidae                                      | 1                 | 2                     |                   |                   |                       |
| Arctiidae                                         | 1                 | 1                     |                   |                   |                       |
